# Supplementary material for: Insights from Syzygium aromaticum Essential Oil: Encapsulation, Characterization, and Antioxidant Activity
Source: MDPI journal article supplement (doi:10.3390/ph17050599), 2024-05-08
Supplement: s1 [file s1]

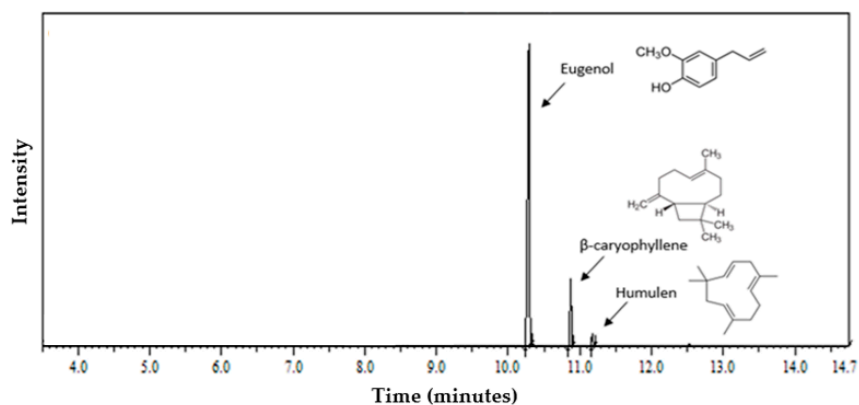

**Figure S1.** Chromatographic profile of clove essential oil obtained by GC/MS.

**Table S1:** Main thermogravimetric and calorimetric data of the samples.

| Samples |     | Thermogravimetry |                            |                 | Scanning Calorimetry |               |                      |                       |
|---------|-----|------------------|----------------------------|-----------------|----------------------|---------------|----------------------|-----------------------|
|         |     | TR (°C)          | Midpoint (°C) <sup>1</sup> | Weight loss (%) |                      | TR (°C)       | PM (°C) <sup>1</sup> | ΔH (J/g) <sup>2</sup> |
| CEO     | I   | 161.3 – 201.1    | 179.2                      | 99.0            | I                    | 25.0 – 44.9   | 26.9                 | -38.3                 |
|         |     |                  |                            |                 | II                   | 164.1 – 180.0 | 176.9                | -85.2                 |
|         |     |                  |                            |                 | III                  | 261.3 – 281.1 | 272.9                | -54.5                 |
|         |     |                  |                            |                 | IV                   | 397.8 – 427.6 | 365.9                | +188.3                |
| LF1     | I   | 63.0 – 120.9     | 86.8                       | 68.4            | I                    | 71.7 – 95.2   | 71.6                 | +2.8                  |
|         | II  | 207.0 – 240.9    | 218.8                      | 12.1            | II                   | 98.4 – 115.9  | 103.8                | -9.9                  |
|         | III | 299.7 – 336.5    | 314.4                      | 9.2             | III                  | 193.3 – 215.9 | 258.2                | -1.7                  |
|         |     |                  |                            |                 | IV                   | 386.6 – 420.2 | 319.5                | -35.6                 |
| LF2     | I   | 63.2 – 106.4     | 83.1                       | 45.1            | I                    | 122.6 – 134.3 | 123.2                | -224.4                |
|         | II  | 211.4 – 239.7    | 224.0                      | 6.6             | II                   | 297.7 – 315.2 | 305.5                | +1.24                 |
|         | III | 316.1 – 346.1    | 327.4                      | 6.6             | II                   | 400.6 – 413.8 | 429.0                | +1.75                 |
| LF3     | I   | 82.4 – 106.3     | 82.4                       | 34.5            | I                    | 28.0 – 50.4   | 51.6                 | +1.43                 |
|         | II  | 309.9 – 348.9    | 327.7                      | 6.3             | II                   | 97.1 – 114.2  | 104.2                | -27.7                 |
| P       | I   | 94.8 – 143.8     | 110.4                      | 32.6            | I                    | 82.7 – 101.4  | 99.9                 | +24.6                 |
|         | II  | 221.2 – 282.6    | 231.2                      | 14.7            | II                   | 291.3 – 315.5 | 334.1                | +15.2                 |
|         | III | 426.6 – 436.1    | 412.3                      | 9.6             | III                  | 401.5 – 455.4 | 453.5                | +11.2                 |
